# Supplementary material for: Polymorphic Covalent Organic Frameworks: Molecularly Defined Pore Structures and Iodine Adsorption Property
Source: Molecules. 2023 Jan 3;28(1):449. doi: 10.3390/molecules28010449 (PMC9824140; doi:10.3390/molecules28010449)
Supplement: Supplementary file 1 [file molecules-28-00449-s001.zip › molecules-2058736-supplementary.pdf]

## Supporting Information

### **Polymorphic covalent organic frameworks: molecularly defined pore structures and iodine adsorption property**

Canran Wang<sup>1</sup>, Shan Jiang<sup>3</sup>, Wenyue Ma<sup>1</sup>, Zhaoyang Liu<sup>1</sup>, \* Leijing Liu<sup>1</sup>,  
Yongcun Zou<sup>2</sup>, Bin Xu<sup>1</sup>, Wenjing Tian<sup>1,\*</sup>

<sup>1</sup> State Key Laboratory of Supramolecular Structure and Materials,  
College of Chemistry, Jilin University, Changchun 130012, China

<sup>2</sup> State Key Laboratory of Inorganic Synthesis and Preparative  
Chemistry, College of Chemistry, Jilin University, Changchun  
130012, China

<sup>3</sup> College of Chemistry and Chemical Engineering, Liaoning Normal  
University, Dalian 116029, China

\* Correspondence: zhaoyangliu@jlu.edu.cn (Z.L.); wjtian@jlu.edu.cn (W.T.)

# Contents

|            |                                                                 |    |
|------------|-----------------------------------------------------------------|----|
| Section S1 | Simulation of two-dimensional structures.....                   | 3  |
| Section S2 | Unit cell parameters.....                                       | 4  |
| Section S3 | SEM analysis.....                                               | 36 |
| Section S4 | Thermogravimetric analysis and <b>structural</b> stability..... | 37 |
| Section S5 | Iodine solution adsorption experiment.....                      | 38 |
| Section S6 | Iodine vapor adsorption experiment.....                         | 39 |

## Section S1 Simulation of two-dimensional structures

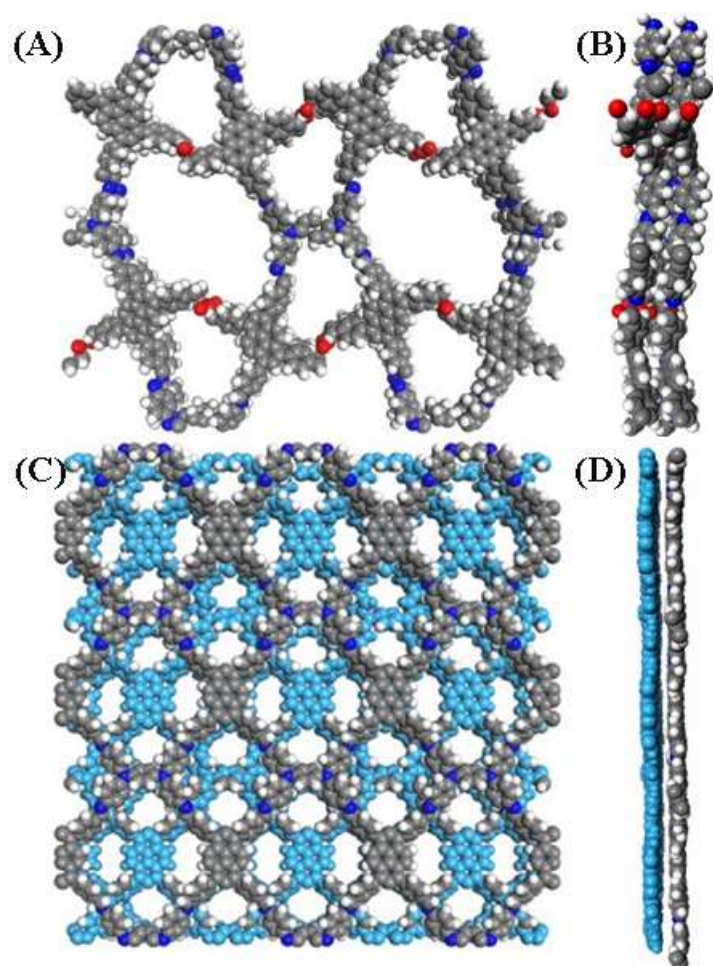

**Figure S1.** (A) Top view of the simulated two-dimensional AA stacking model structure of PyT-1; (B) Side view of the simulated

two-dimensional AA stacking model structure of PyT-1; (C) Top view of the simulated two-dimensional AB stacking model structure of PyT-2; (D) Side view of the simulated two-dimensional AB stacking model structure of PyT-2.

## **Section S2 Unit cell parameters**

| Pyt-1                                                                   |         |         |         |
|-------------------------------------------------------------------------|---------|---------|---------|
| Triclinic P1                                                            |         |         |         |
| a=34.8957 Å, b=56.3226 Å, c=9.2810 Å                                    |         |         |         |
| $\alpha = 89.7348^\circ, \beta = 89.2027^\circ, \gamma = 92.3580^\circ$ |         |         |         |
| C1                                                                      | 0.51666 | 0.23691 | 1.17777 |
| C2                                                                      | 0.50021 | 0.25941 | 1.1586  |
| C3                                                                      | 0.46077 | 0.26067 | 1.12441 |
| C4                                                                      | 0.43832 | 0.23943 | 1.11677 |
| C5                                                                      | 0.45423 | 0.21754 | 1.13772 |
| C6                                                                      | 0.49338 | 0.21579 | 1.16689 |
| C7                                                                      | 0.55624 | 0.23561 | 1.20916 |
| C8                                                                      | 0.57734 | 0.25683 | 1.23774 |
| C9                                                                      | 0.56132 | 0.27886 | 1.219   |
| C10                                                                     | 0.52309 | 0.28059 | 1.17591 |
| C11                                                                     | 0.50993 | 0.19344 | 1.18389 |
| C12                                                                     | 0.54951 | 0.19247 | 1.2015  |
| C13                                                                     | 0.57324 | 0.21308 | 1.21385 |
| C14                                                                     | 0.44465 | 0.28314 | 1.10382 |
| C15                                                                     | 0.46795 | 0.30376 | 1.11865 |
| C16                                                                     | 0.50661 | 0.30289 | 1.15527 |
| C17                                                                     | 0.61558 | 0.21001 | 1.22169 |
| C18                                                                     | 0.48691 | 0.17066 | 1.18529 |
| C19                                                                     | 0.52821 | 0.32593 | 1.17202 |
| C20                                                                     | 0.40355 | 0.28612 | 1.06944 |
| C21                                                                     | 0.64153 | 0.22418 | 1.13775 |
| C22                                                                     | 0.68066 | 0.21973 | 1.13514 |
| C23                                                                     | 0.69447 | 0.20034 | 1.21105 |
| C24                                                                     | 0.66889 | 0.18622 | 1.29559 |
| C25                                                                     | 0.62995 | 0.19112 | 1.30178 |
| C26                                                                     | 0.45691 | 0.16691 | 1.28586 |
| C27                                                                     | 0.4352  | 0.14553 | 1.28882 |
| C28                                                                     | 0.44338 | 0.12737 | 1.19178 |
| C29                                                                     | 0.47399 | 0.13086 | 1.09279 |
| C30                                                                     | 0.49573 | 0.15231 | 1.09015 |

|     |          |         |         |
|-----|----------|---------|---------|
| C31 | 0.38662  | 0.27456 | 0.95134 |
| C32 | 0.34792  | 0.27724 | 0.92076 |
| C33 | 0.32565  | 0.29206 | 1.00597 |
| C34 | 0.34275  | 0.30418 | 1.1218  |
| C35 | 0.38138  | 0.30129 | 1.15295 |
| C36 | 0.55988  | 0.33204 | 1.08268 |
| C37 | 0.57781  | 0.3547  | 1.09016 |
| C38 | 0.56416  | 0.37161 | 1.18677 |
| C39 | 0.53279  | 0.36529 | 1.27775 |
| C40 | 0.51494  | 0.3427  | 1.27003 |
| C41 | -0.27694 | 0.15102 | 1.23785 |
| C42 | 0.41895  | 0.10536 | 1.19262 |
| C43 | 0.58244  | 0.39574 | 1.19101 |
| C44 | 0.28478  | 0.29506 | 0.9751  |
| C45 | 0.16468  | 0.01771 | 0.94913 |
| C46 | 0.13434  | 0.99614 | 1.88918 |
| C47 | 0.17384  | 0.99304 | 1.89547 |
| N48 | 0.12317  | 0.02035 | 0.95959 |
| C49 | 0.05108  | 1.00029 | 1.93905 |
| C50 | 0.10642  | 0.0435  | 0.96542 |
| C51 | 0.0174   | 0.99929 | 1.85797 |
| C52 | -0.00668 | 0.97882 | 1.85903 |
| C53 | 0.00243  | 0.95893 | 1.94004 |
| C54 | 0.03514  | 0.96026 | 2.02729 |
| C55 | 0.05845  | 0.98108 | 2.02998 |
| C56 | 0.07541  | 0.04727 | 1.0595  |
| C57 | 0.05972  | 0.0696  | 1.07031 |
| C58 | 0.0749   | 0.08879 | 0.98967 |
| C59 | 0.10496  | 0.08507 | 0.89077 |
| C60 | 0.11974  | 0.06239 | 0.87601 |
| N61 | -0.02111 | 0.93763 | 1.92353 |
| N62 | 0.05875  | 0.11149 | 1.01348 |
| O63 | 0.13261  | 0.72625 | 1.28755 |
| O64 | 0.65879  | 0.83416 | 1.70074 |

|     |          |         |         |
|-----|----------|---------|---------|
| H65 | 0.40782  | 0.23939 | 1.0986  |
| H66 | 0.43534  | 0.20194 | 1.12857 |
| H67 | 0.60639  | 0.25665 | 1.27673 |
| H68 | 0.57923  | 0.29456 | 1.23955 |
| H69 | 0.56194  | 0.17517 | 1.20543 |
| H70 | 0.45576  | 0.32091 | 1.1006  |
| H71 | 0.63142  | 0.23812 | 1.06899 |
| H72 | 0.70004  | 0.23093 | 1.06977 |
| H73 | 0.67901  | 0.17134 | 1.35673 |
| H74 | 0.61097  | 0.18005 | 1.36957 |
| H75 | 0.4502   | 0.18073 | 1.3611  |
| H76 | 0.41197  | 0.14318 | 1.36692 |
| H77 | 0.48067  | 0.1171  | 1.01634 |
| H78 | 0.51882  | 0.15485 | 1.01163 |
| H79 | 0.40344  | 0.26329 | 0.88398 |
| H80 | 0.3353   | 0.26807 | 0.82936 |
| H81 | 0.32609  | 0.31567 | 1.18928 |
| H82 | 0.39378  | 0.31044 | 1.24473 |
| H83 | 0.57011  | 0.3194  | 1.00538 |
| H84 | 0.60179  | 0.35919 | 1.01839 |
| H85 | 0.52195  | 0.37792 | 1.35432 |
| H86 | 0.49058  | 0.33825 | 1.34018 |
| H87 | -0.2653  | 0.13864 | 1.3137  |
| H88 | 0.39778  | 0.10293 | 1.27805 |
| H89 | 0.60618  | 0.40004 | 1.11817 |
| H90 | 0.26786  | 0.30581 | 1.04567 |
| H91 | 0.11625  | 0.98076 | 1.86437 |
| H92 | 0.1834   | 0.97511 | 1.89012 |
| H93 | 0.05657  | 0.01344 | 0.81951 |
| H94 | -0.03175 | 0.97796 | 1.79155 |
| H95 | 0.04295  | 0.94554 | 2.09395 |
| H96 | 0.0829   | 0.98208 | 2.10046 |
| H97 | 0.06403  | 0.03302 | 1.12794 |
| H98 | 0.03642  | 0.07231 | 1.14599 |

|      |          |         |         |
|------|----------|---------|---------|
| H99  | 0.1165   | 0.09925 | 0.82245 |
| H100 | 0.14173  | 0.05954 | 0.79524 |
| C101 | -0.11599 | 0.79262 | 1.76468 |
| C102 | -0.09954 | 0.77233 | 1.70158 |
| C103 | -0.06011 | 0.77311 | 1.66066 |
| C104 | -0.03766 | 0.79376 | 1.68991 |
| C105 | -0.05356 | 0.81337 | 1.75347 |
| C106 | -0.09271 | 0.81334 | 1.79052 |
| C107 | -0.15556 | 0.79204 | 1.80306 |
| C108 | -0.17665 | 0.7703  | 1.79349 |
| C109 | -0.16064 | 0.75045 | 1.73176 |
| C110 | -0.12242 | 0.75123 | 1.68169 |
| C111 | -0.10925 | 0.83358 | 1.85128 |
| C112 | -0.14882 | 0.83342 | 1.87595 |
| C113 | -0.17255 | 0.8131  | 1.85254 |
| C114 | -0.044   | 0.75292 | 1.59631 |
| C115 | -0.0673  | 0.73248 | 1.57519 |
| C116 | -0.10595 | 0.73121 | 1.61756 |
| C117 | -0.21488 | 0.81543 | 1.87232 |
| C118 | -0.08622 | 0.85524 | 1.89194 |
| C119 | -0.12756 | 0.70837 | 1.59344 |
| C120 | -0.00291 | 0.75207 | 1.55172 |
| C121 | -0.24086 | 0.80629 | 1.76999 |
| C122 | -0.27998 | 0.81049 | 1.78194 |
| C123 | -0.29378 | 0.82484 | 1.89263 |
| C124 | -0.26817 | 0.83391 | 1.99549 |
| C125 | -0.22923 | 0.8291  | 1.98613 |
| C126 | -0.05619 | 0.85364 | 1.98982 |
| C127 | -0.03448 | 0.87386 | 2.02952 |
| C128 | -0.04267 | 0.89617 | 1.97285 |
| C129 | -0.07331 | 0.89793 | 1.87707 |
| C130 | -0.09505 | 0.87762 | 1.83754 |
| C131 | 0.01399  | 0.76933 | 1.45876 |
| C132 | 0.05269  | 0.76855 | 1.4187  |

|      |          |         |         |
|------|----------|---------|---------|
| C133 | 0.07497  | 0.75009 | 1.46823 |
| C134 | 0.05789  | 0.73243 | 1.55802 |
| C135 | 0.01928  | 0.73338 | 1.599   |
| C136 | -0.15925 | 0.70713 | 1.50202 |
| C137 | -0.17718 | 0.68516 | 1.46924 |
| C138 | -0.16352 | 0.66409 | 1.527   |
| C139 | -0.13212 | 0.66543 | 1.6204  |
| C140 | -0.11426 | 0.68736 | 1.65285 |
| C141 | 0.67764  | 0.87431 | 1.86061 |
| C142 | -0.01825 | 0.91712 | 2.0113  |
| C143 | -0.18179 | 0.64088 | 1.48844 |
| C144 | 0.11583  | 0.74904 | 1.42695 |
| C145 | 0.23599  | 1.01418 | 1.90585 |
| C146 | 0.26633  | 0.03613 | 0.95153 |
| C147 | 0.22683  | 0.03857 | 0.96945 |
| N148 | 0.2775   | 1.0113  | 1.90438 |
| C149 | 0.3496   | 0.02991 | 0.97818 |
| C150 | 0.29425  | 0.98909 | 1.86375 |
| C151 | 0.38326  | 0.03527 | 0.8979  |
| C152 | 0.40734  | 0.05474 | 0.93371 |
| C153 | 0.39825  | 0.06933 | 1.04945 |
| C154 | 0.36557  | 0.06334 | 1.13483 |
| C155 | 0.34225  | 0.04334 | 1.1018  |
| C156 | 0.32527  | 0.98069 | 1.94115 |
| C157 | 0.34096  | 0.95899 | 1.90695 |
| C158 | 0.32576  | 0.94495 | 1.79661 |
| C159 | 0.29568  | 0.95356 | 1.7144  |
| C160 | 0.2809   | 0.9758  | 1.74538 |
| N161 | 0.4218   | 0.09052 | 1.07024 |
| N162 | 0.34191  | 0.92222 | 1.77399 |
| O163 | 0.26798  | 0.32395 | 0.88827 |
| O164 | -0.25812 | 0.1976  | 1.15874 |
| H165 | -0.00716 | 0.79488 | 1.66803 |
| H166 | -0.03467 | 0.82873 | 1.77122 |

|      |          |         |         |
|------|----------|---------|---------|
| H167 | -0.20569 | 0.76831 | 1.83535 |
| H168 | -0.17856 | 0.73439 | 1.72449 |
| H169 | -0.16124 | 0.84958 | 1.91417 |
| H170 | -0.05512 | 0.71719 | 1.52387 |
| H171 | -0.23077 | 0.7967  | 1.6769  |
| H172 | -0.29938 | 0.80321 | 1.7018  |
| H173 | -0.27827 | 0.84478 | 2.08312 |
| H174 | -0.21024 | 0.83611 | 2.06837 |
| H175 | -0.04947 | 0.83659 | 2.03418 |
| H176 | -0.01123 | 0.87209 | 2.10449 |
| H177 | -0.08001 | 0.91498 | 1.83142 |
| H178 | -0.11816 | 0.87923 | 1.76179 |
| H179 | -0.00284 | 0.78349 | 1.41863 |
| H180 | 0.06528  | 0.78211 | 1.34723 |
| H181 | 0.07456  | 0.71805 | 1.59785 |
| H182 | 0.0069   | 0.71981 | 1.6708  |
| H183 | -0.1695  | 0.72315 | 1.45403 |
| H184 | -0.20118 | 0.68457 | 1.39638 |
| H185 | -0.12127 | 0.64946 | 1.66763 |
| H186 | -0.08989 | 0.688   | 1.72403 |
| H187 | 0.66601  | 0.88202 | 1.95772 |
| H188 | 0.00295  | 0.91502 | 2.0937  |
| H189 | -0.20556 | 0.64053 | 1.41487 |
| H190 | 0.13277  | 0.73519 | 1.47108 |
| H191 | 0.28441  | 0.05211 | 0.95416 |
| H192 | 0.21727  | 0.05584 | 0.99961 |
| H193 | 0.34407  | 1.02549 | 1.77411 |
| H194 | 0.4324   | 0.05921 | 0.8674  |
| H195 | 0.35777  | 0.07378 | 1.22702 |
| H196 | 0.31782  | 0.03858 | 1.17059 |
| H197 | 0.33667  | 0.99066 | 2.03117 |
| H198 | 0.36427  | 0.95254 | 1.97007 |
| H199 | 0.28411  | 0.94363 | 1.62463 |
| H200 | 0.25889  | 0.98265 | 1.67747 |

|      |          |         |         |
|------|----------|---------|---------|
| C201 | 0.00692  | 0.29658 | 1.27586 |
| C202 | -0.00751 | 0.27498 | 1.21393 |
| C203 | -0.04678 | 0.27239 | 1.17602 |
| C204 | -0.07106 | 0.29105 | 1.20705 |
| C205 | -0.05712 | 0.31193 | 1.26947 |
| C206 | -0.01819 | 0.31523 | 1.30354 |
| C207 | 0.04631  | 0.29937 | 1.31122 |
| C208 | 0.06929  | 0.27952 | 1.29998 |
| C209 | 0.05525  | 0.25838 | 1.23939 |
| C210 | 0.01722  | 0.25591 | 1.19223 |
| C211 | -0.00366 | 0.33681 | 1.36312 |
| C212 | 0.03573  | 0.34001 | 1.38478 |
| C213 | 0.06124  | 0.3218  | 1.35949 |
| C214 | -0.06088 | 0.25091 | 1.11282 |
| C215 | -0.03579 | 0.23254 | 1.08985 |
| C216 | 0.00274  | 0.23456 | 1.12928 |
| C217 | 0.10316  | 0.32773 | 1.37606 |
| C218 | -0.02863 | 0.35641 | 1.40561 |
| C219 | 0.02637  | 0.21366 | 1.10343 |
| C220 | -0.10164 | 0.24657 | 1.07135 |
| C221 | 0.13009  | 0.32084 | 1.27171 |
| C222 | 0.16866  | 0.32836 | 1.28069 |
| C223 | 0.18088  | 0.34383 | 1.39039 |
| C224 | 0.15433  | 0.35066 | 1.49525 |
| C225 | 0.11599  | 0.34255 | 1.48883 |
| C226 | -0.05862 | 0.35225 | 1.50578 |
| C227 | -0.08214 | 0.37054 | 1.5472  |
| C228 | -0.07586 | 0.39346 | 1.48998 |
| C229 | -0.04528 | 0.39784 | 1.39186 |
| C230 | -0.02172 | 0.37946 | 1.35061 |
| C231 | -0.11982 | 0.26232 | 0.97973 |
| C232 | -0.15822 | 0.25826 | 0.94261 |
| C233 | -0.17887 | 0.23797 | 0.99378 |
| C234 | -0.16047 | 0.22182 | 1.08221 |

|      |          |         |         |
|------|----------|---------|---------|
| C235 | -0.12217 | 0.22605 | 1.12026 |
| C236 | 0.05825  | 0.21513 | 1.00959 |
| C237 | 0.07815  | 0.19478 | 0.97537 |
| C238 | 0.0663   | 0.17262 | 1.0341  |
| C239 | 0.0347   | 0.17127 | 1.1299  |
| C240 | 0.01488  | 0.19159 | 1.16379 |
| C241 | 0.22076  | 0.35351 | 1.3939  |
| C242 | -0.10216 | 0.41225 | 1.53037 |
| C243 | 0.08668  | 0.15106 | 0.99406 |
| C244 | -0.2194  | 0.23344 | 0.9556  |
| C245 | 0.64812  | 0.53049 | 1.40599 |
| C246 | 0.66165  | 0.5543  | 1.42059 |
| C247 | 0.70074  | 0.5601  | 1.43551 |
| N248 | 0.60702  | 0.52408 | 1.40768 |
| C249 | 0.57919  | 0.54101 | 1.45356 |
| C250 | 0.59242  | 0.50053 | 1.36824 |
| C251 | 0.54535  | 0.54348 | 1.37585 |
| C252 | 0.51954  | 0.56082 | 1.41356 |
| C253 | 0.52703  | 0.57611 | 1.52867 |
| C254 | 0.55994  | 0.57293 | 1.61156 |
| C255 | 0.58504  | 0.555   | 1.57668 |
| C256 | 0.56209  | 0.48952 | 1.44798 |
| C257 | 0.54848  | 0.46657 | 1.4149  |
| C258 | 0.56513  | 0.45388 | 1.30335 |
| C259 | 0.5945   | 0.46503 | 1.21887 |
| C260 | 0.60716  | 0.48845 | 1.2488  |
| N261 | 0.50163  | 0.59521 | 1.55133 |
| N262 | 0.55112  | 0.42986 | 1.28187 |
| O263 | 0.63435  | 0.84088 | 1.35843 |
| O264 | 0.15718  | 0.71662 | 1.62704 |
| H265 | -0.10149 | 0.28956 | 1.18749 |
| H266 | -0.07735 | 0.32562 | 1.28871 |
| H267 | 0.09831  | 0.28    | 1.33962 |
| H268 | 0.07456  | 0.24391 | 1.2307  |

|      |          |         |         |
|------|----------|---------|---------|
| H269 | 0.04657  | 0.35717 | 1.42211 |
| H270 | -0.04644 | 0.21627 | 1.0394  |
| H271 | 0.12109  | 0.31044 | 1.17935 |
| H272 | 0.18881  | 0.32277 | 1.19905 |
| H273 | 0.16322  | 0.36234 | 1.58215 |
| H274 | 0.09625  | 0.34792 | 1.57254 |
| H275 | -0.06388 | 0.33469 | 1.5506  |
| H276 | -0.10531 | 0.36678 | 1.62394 |
| H277 | -0.04004 | 0.4154  | 1.34576 |
| H278 | 0.00132  | 0.38305 | 1.2731  |
| H279 | -0.10424 | 0.27787 | 0.93836 |
| H280 | -0.17182 | 0.27069 | 0.87214 |
| H281 | -0.17587 | 0.20606 | 1.12327 |
| H282 | -0.10878 | 0.21359 | 1.19108 |
| H283 | 0.06713  | 0.23197 | 0.96087 |
| H284 | 0.10227  | 0.19624 | 0.90068 |
| H285 | 0.02522  | 0.15443 | 1.17791 |
| H286 | -0.00962 | 0.19014 | 1.23684 |
| H287 | 0.23144  | 0.36217 | 1.49016 |
| H288 | -0.12326 | 0.40835 | 1.61438 |
| H289 | 0.11054  | 0.15274 | 0.91868 |
| H290 | -0.23512 | 0.2182  | 1.00098 |
| H291 | 0.64219  | 0.56868 | 1.42465 |
| H292 | -0.30337 | 0.53489 | 1.5036  |
| H293 | 0.53971  | 0.53256 | 1.28251 |
| H294 | 0.49431  | 0.56314 | 1.34917 |
| H295 | 0.56657  | 0.58398 | 1.70319 |
| H296 | 0.60965  | 0.55233 | 1.6436  |
| H297 | 0.54965  | 0.49847 | 1.53892 |
| H298 | 0.5257   | 0.45815 | 1.47978 |
| H299 | 0.60711  | 0.45614 | 1.12818 |
| H300 | 0.62862  | 0.49716 | 1.17923 |
| C301 | 0.39376  | 0.73295 | 1.66659 |
| C302 | 0.40818  | 0.75677 | 1.64624 |

|      |         |         |         |
|------|---------|---------|---------|
| C303 | 0.44744 | 0.76138 | 1.60905 |
| C304 | 0.47172 | 0.74214 | 1.59963 |
| C305 | 0.45779 | 0.71898 | 1.62172 |
| C306 | 0.41887 | 0.71389 | 1.65387 |
| C307 | 0.35438 | 0.72827 | 1.701   |
| C308 | 0.3314  | 0.74762 | 1.73126 |
| C309 | 0.34542 | 0.77092 | 1.71137 |
| C310 | 0.38345 | 0.77591 | 1.66537 |
| C311 | 0.40435 | 0.69022 | 1.67205 |
| C312 | 0.36496 | 0.68587 | 1.69267 |
| C313 | 0.33945 | 0.70439 | 1.7069  |
| C314 | 0.46152 | 0.78515 | 1.58731 |
| C315 | 0.43643 | 0.8037  | 1.60398 |
| C316 | 0.39791 | 0.79954 | 1.64355 |
| C317 | 0.29753 | 0.69771 | 1.71796 |
| C318 | 0.42933 | 0.66949 | 1.67162 |
| C319 | 0.37429 | 0.82064 | 1.66203 |
| C320 | 0.50228 | 0.79162 | 1.54981 |
| C321 | 0.27059 | 0.70962 | 1.63604 |
| C322 | 0.23201 | 0.70185 | 1.63638 |
| C323 | 0.21982 | 0.68136 | 1.71328 |
| C324 | 0.24639 | 0.66947 | 1.79583 |
| C325 | 0.28473 | 0.67766 | 1.79908 |
| C326 | 0.45933 | 0.6683  | 1.76991 |
| C327 | 0.48286 | 0.64885 | 1.77113 |
| C328 | 0.47656 | 0.63007 | 1.67465 |
| C329 | 0.44596 | 0.63095 | 1.578   |
| C330 | 0.42239 | 0.65046 | 1.57708 |
| C331 | 0.52043 | 0.78156 | 1.43037 |
| C332 | 0.55882 | 0.78753 | 1.39685 |
| C333 | 0.57949 | 0.80419 | 1.48043 |
| C334 | 0.56111 | 0.81479 | 1.59761 |
| C335 | 0.52283 | 0.80862 | 1.63169 |
| C336 | 0.34238 | 0.82404 | 1.57511 |

|      |          |         |         |
|------|----------|---------|---------|
| C337 | 0.32248  | 0.84508 | 1.58403 |
| C338 | 0.33434  | 0.86308 | 1.67966 |
| C339 | 0.36597  | 0.85945 | 1.76824 |
| C340 | 0.3858   | 0.83847 | 1.75909 |
| C341 | 0.17994  | 0.67181 | 1.70456 |
| C342 | 0.50286  | 0.61023 | 1.67355 |
| C343 | 0.31397  | 0.88556 | 1.68539 |
| C344 | 0.62001  | 0.81066 | 1.44645 |
| C345 | -0.24745 | 0.5014  | 1.44899 |
| C346 | -0.26098 | 0.47798 | 1.42012 |
| C347 | -0.30007 | 0.47152 | 1.42941 |
| N348 | -0.20636 | 0.50756 | 1.45629 |
| C349 | -0.17851 | 0.4892  | 1.46367 |
| C350 | -0.19176 | 0.53205 | 1.46092 |
| C351 | -0.1447  | 0.49108 | 1.38001 |
| C352 | -0.11888 | 0.47274 | 1.37918 |
| C353 | -0.12635 | 0.45215 | 1.46082 |
| C354 | -0.15924 | 0.45067 | 1.55057 |
| C355 | -0.18434 | 0.46943 | 1.55511 |
| C356 | -0.16141 | 0.53844 | 1.55266 |
| C357 | -0.1478  | 0.56202 | 1.56236 |
| C358 | -0.16447 | 0.57986 | 1.48293 |
| C359 | -0.19387 | 0.57359 | 1.3863  |
| C360 | -0.20653 | 0.54974 | 1.37259 |
| N361 | -0.10094 | 0.43293 | 1.44244 |
| N362 | -0.15046 | 0.60384 | 1.50559 |
| O363 | -0.23376 | 0.20932 | 0.81739 |
| O364 | 0.24348  | 0.31514 | 1.23244 |
| H365 | 0.50215  | 0.7447  | 1.57914 |
| H366 | 0.47802  | 0.70505 | 1.61108 |
| H367 | 0.30239  | 0.74495 | 1.77246 |
| H368 | 0.32612  | 0.78503 | 1.73334 |
| H369 | 0.35413  | 0.66758 | 1.69749 |
| H370 | 0.44708  | 0.82183 | 1.58506 |

|      |          |         |         |
|------|----------|---------|---------|
| H371 | 0.27956  | 0.72438 | 1.56654 |
| H372 | 0.21184  | 0.71137 | 1.57252 |
| H373 | 0.23751  | 0.65377 | 1.85771 |
| H374 | 0.30448  | 0.66825 | 1.86539 |
| H375 | 0.46461  | 0.68263 | 1.84468 |
| H376 | 0.50605  | 0.64848 | 1.84747 |
| H377 | 0.44071  | 0.61668 | 1.50199 |
| H378 | 0.39933  | 0.65104 | 1.50032 |
| H379 | 0.50484  | 0.76891 | 1.36425 |
| H380 | 0.57241  | 0.77949 | 1.30445 |
| H381 | 0.57653  | 0.82765 | 1.66386 |
| H382 | 0.50945  | 0.81667 | 1.72445 |
| H383 | 0.33349  | 0.81058 | 1.49854 |
| H384 | 0.29834  | 0.84751 | 1.5141  |
| H385 | 0.37547  | 0.87295 | 1.84404 |
| H386 | 0.41031  | 0.83611 | 1.82737 |
| H387 | 0.16928  | 0.65848 | 1.78126 |
| H388 | 0.52399  | 0.60961 | 1.75737 |
| H389 | 0.29008  | 0.88783 | 1.61436 |
| H390 | 0.63574  | 0.82281 | 1.51578 |
| H391 | -0.24153 | 0.46419 | 1.39388 |
| H392 | 0.70404  | 0.49606 | 1.38613 |
| H393 | -0.13908 | 0.50638 | 1.31111 |
| H394 | -0.09367 | 0.47403 | 1.30978 |
| H395 | -0.16585 | 0.43534 | 1.61777 |
| H396 | -0.20894 | 0.46834 | 1.62746 |
| H397 | -0.14895 | 0.52521 | 1.6202  |
| H398 | -0.125   | 0.5667  | 1.63628 |
| H399 | -0.20649 | 0.58675 | 1.3189  |
| H400 | -0.228   | 0.54504 | 1.29347 |
| C401 | 0.80929  | 0.2333  | 0.97448 |
| C402 | 0.79385  | 0.25529 | 0.93301 |
| C403 | 0.75448  | 0.25623 | 0.89703 |
| C404 | 0.73111  | 0.23539 | 0.90977 |

|      |         |         |         |
|------|---------|---------|---------|
| C405 | 0.74603 | 0.21407 | 0.95238 |
| C406 | 0.78509 | 0.2125  | 0.98391 |
| C407 | 0.84879 | 0.23223 | 1.00777 |
| C408 | 0.87083 | 0.25364 | 1.01564 |
| C409 | 0.8558  | 0.27516 | 0.97508 |
| C410 | 0.81766 | 0.27632 | 0.92987 |
| C411 | 0.80063 | 0.19061 | 1.02307 |
| C412 | 0.84013 | 0.18949 | 1.04244 |
| C413 | 0.86475 | 0.20983 | 1.03498 |
| C414 | 0.73937 | 0.27815 | 0.8542  |
| C415 | 0.76358 | 0.29855 | 0.84917 |
| C416 | 0.80218 | 0.29807 | 0.88716 |
| C417 | 0.9069  | 0.20633 | 1.04687 |
| C418 | 0.77662 | 0.16849 | 1.04625 |
| C419 | 0.82481 | 0.32095 | 0.8816  |
| C420 | 0.69843 | 0.28082 | 0.81628 |
| C421 | 0.93336 | 0.2177  | 0.95086 |
| C422 | 0.97223 | 0.21261 | 0.95369 |
| C423 | 0.98524 | 0.19526 | 1.04797 |
| C424 | 0.95915 | 0.18396 | 1.14453 |
| C425 | 0.9205  | 0.18957 | 1.14479 |
| C426 | 0.7466  | 0.16793 | 1.14831 |
| C427 | 0.72398 | 0.14722 | 1.17166 |
| C428 | 0.73122 | 0.12656 | 1.09405 |
| C429 | 0.76184 | 0.12688 | 0.99383 |
| C430 | 0.7845  | 0.14768 | 0.97071 |
| C431 | 0.68088 | 0.26651 | 0.71074 |
| C432 | 0.64232 | 0.26895 | 0.67693 |
| C433 | 0.62085 | 0.28622 | 0.74579 |
| C434 | 0.63859 | 0.30101 | 0.84855 |
| C435 | 0.67706 | 0.29839 | 0.88312 |
| C436 | 0.85661 | 0.32411 | 0.78833 |
| C437 | 0.87553 | 0.34642 | 0.7739  |
| C438 | 0.86277 | 0.36592 | 0.85218 |

|      |         |         |         |
|------|---------|---------|---------|
| C439 | 0.83126 | 0.3626  | 0.94727 |
| C440 | 0.81241 | 0.34034 | 0.9614  |
| C441 | 0.01308 | 0.16243 | 1.09711 |
| C442 | 0.70584 | 0.10521 | 1.11587 |
| C443 | 0.8821  | 0.3896  | 0.83313 |
| C444 | 0.58013 | 0.289   | 0.71131 |
| C445 | 0.44775 | 0.01607 | 0.95521 |
| C446 | 0.46234 | 1.00864 | 0.91935 |
| C447 | 0.50165 | 1.00512 | 0.92964 |
| N448 | 0.40643 | 0.0196  | 0.96183 |
| C449 | 0.37945 | 1.01537 | 0.96223 |
| C450 | 0.39075 | 0.0429  | 0.94437 |
| C451 | 0.34568 | 1.01274 | 0.88238 |
| C452 | 0.32073 | 0.99292 | 0.90291 |
| C453 | 0.32902 | 0.97528 | 1.00258 |
| C454 | 0.36183 | 0.9784  | 1.08818 |
| C455 | 0.38605 | 0.99869 | 1.07098 |
| C456 | 0.36006 | 0.04962 | 1.0326  |
| C457 | 0.3454  | 0.07222 | 1.02089 |
| C458 | 0.36134 | 0.08881 | 0.92291 |
| C459 | 0.39108 | 0.08202 | 0.82985 |
| C460 | 0.4048  | 0.05898 | 0.83799 |
| N461 | 0.30454 | 0.95415 | 1.00662 |
| N462 | 0.34625 | 0.11213 | 0.92364 |
| O463 | 0.44786 | 0.72588 | 0.59142 |
| O464 | 0.97855 | 0.83531 | 0.90671 |
| H465 | 0.70063 | 0.23534 | 0.89109 |
| H466 | 0.72647 | 0.1987  | 0.95819 |
| H467 | 0.89988 | 0.25404 | 1.05504 |
| H468 | 0.87442 | 0.29094 | 0.98038 |
| H469 | 0.85176 | 0.17231 | 1.06366 |
| H470 | 0.75216 | 0.31522 | 0.81418 |
| H471 | 0.92382 | 0.2298  | 0.86907 |
| H472 | 0.99201 | 0.22164 | 0.87873 |

|      |         |         |         |
|------|---------|---------|---------|
| H473 | 0.96865 | 0.17072 | 1.21972 |
| H474 | 0.90112 | 0.18074 | 1.222   |
| H475 | 0.74061 | 0.1837  | 1.20872 |
| H476 | 0.70076 | 0.14734 | 1.25037 |
| H477 | 0.7678  | 0.11115 | 0.93214 |
| H478 | 0.80758 | 0.14774 | 0.8914  |
| H479 | 0.69709 | 0.25332 | 0.65585 |
| H480 | 0.62922 | 0.25765 | 0.59548 |
| H481 | 0.62255 | 0.31443 | 0.90334 |
| H482 | 0.68996 | 0.30968 | 0.96495 |
| H483 | 0.86617 | 0.3094  | 0.72481 |
| H484 | 0.8996  | 0.34857 | 0.69937 |
| H485 | 0.82109 | 0.37729 | 1.01007 |
| H486 | 0.78797 | 0.3382  | 1.03429 |
| H487 | 0.02423 | 0.15203 | 1.18439 |
| H488 | 0.68468 | 0.10541 | 1.20194 |
| H489 | 0.90593 | 0.39154 | 0.7577  |
| H490 | 0.5638  | 0.30177 | 0.76988 |
| H491 | 0.44357 | 0.99305 | 0.90954 |
| H492 | 0.51039 | 0.9871  | 0.94225 |
| H493 | 0.33947 | 0.01009 | 0.82872 |
| H494 | 0.29558 | 0.99066 | 0.83655 |
| H495 | 0.36905 | 0.96551 | 1.16858 |
| H496 | 0.41058 | 1.00118 | 1.14014 |
| H497 | 0.34814 | 0.03754 | 1.1138  |
| H498 | 0.32235 | 0.07728 | 1.09223 |
| H499 | 0.40317 | 0.09404 | 0.74884 |
| H500 | 0.42654 | 0.05367 | 0.76173 |
| C501 | 0.20313 | 0.80808 | 0.99005 |
| C502 | 0.21858 | 0.78609 | 0.9482  |
| C503 | 0.25794 | 0.78515 | 0.90815 |
| C504 | 0.28131 | 0.80599 | 0.91728 |
| C505 | 0.26639 | 0.82731 | 0.96025 |
| C506 | 0.22733 | 0.82888 | 0.99577 |

|      |         |         |         |
|------|---------|---------|---------|
| C507 | 0.16363 | 0.80915 | 1.02741 |
| C508 | 0.14159 | 0.78774 | 1.03879 |
| C509 | 0.15662 | 0.76622 | 0.99786 |
| C510 | 0.19476 | 0.76506 | 0.94873 |
| C511 | 0.21179 | 0.85077 | 1.03534 |
| C512 | 0.17229 | 0.85189 | 1.05878 |
| C513 | 0.14767 | 0.83155 | 1.05504 |
| C514 | 0.27305 | 0.76323 | 0.86497 |
| C515 | 0.24884 | 0.74283 | 0.86362 |
| C516 | 0.21024 | 0.74331 | 0.90562 |
| C517 | 0.10552 | 0.83504 | 1.07113 |
| C518 | 0.2358  | 0.87289 | 1.05476 |
| C519 | 0.18761 | 0.72043 | 0.90372 |
| C520 | 0.31399 | 0.76056 | 0.82292 |
| C521 | 0.07906 | 0.82368 | 0.97853 |
| C522 | 0.0402  | 0.82877 | 0.98514 |
| C523 | 0.02719 | 0.84612 | 1.07981 |
| C524 | 0.05327 | 0.85742 | 1.17301 |
| C525 | 0.09193 | 0.85181 | 1.16954 |
| C526 | 0.26582 | 0.87345 | 1.15364 |
| C527 | 0.28845 | 0.89416 | 1.17347 |
| C528 | 0.2812  | 0.91482 | 1.09545 |
| C529 | 0.25059 | 0.91449 | 0.99845 |
| C530 | 0.22792 | 0.8937  | 0.97888 |
| C531 | 0.33154 | 0.77487 | 0.71474 |
| C532 | 0.3701  | 0.77243 | 0.67703 |
| C533 | 0.39158 | 0.75516 | 0.74461 |
| C534 | 0.37383 | 0.74037 | 0.85006 |
| C535 | 0.33536 | 0.74299 | 0.88851 |
| C536 | 0.15581 | 0.71727 | 0.81396 |
| C537 | 0.13689 | 0.69495 | 0.80276 |
| C538 | 0.14965 | 0.67546 | 0.8808  |
| C539 | 0.18116 | 0.67878 | 0.9724  |
| C540 | 0.20001 | 0.70104 | 0.98331 |

|      |         |         |         |
|------|---------|---------|---------|
| C541 | 0.99934 | 0.87895 | 1.02539 |
| C542 | 0.30658 | 0.93617 | 1.11342 |
| C543 | 0.13032 | 0.65178 | 0.8651  |
| C544 | 0.43229 | 0.75238 | 0.70603 |
| C545 | 0.56467 | 1.02531 | 0.92075 |
| C546 | 0.55008 | 0.03274 | 0.94217 |
| C547 | 0.51077 | 0.03626 | 0.95638 |
| N548 | 0.60599 | 1.02178 | 0.92324 |
| C549 | 0.63298 | 0.02601 | 0.97676 |
| C550 | 0.62167 | 0.99848 | 0.90545 |
| C551 | 0.66674 | 0.02864 | 0.89322 |
| C552 | 0.69169 | 0.04846 | 0.91003 |
| C553 | 0.6834  | 0.0661  | 1.00958 |
| C554 | 0.65059 | 0.06298 | 1.09878 |
| C555 | 0.62637 | 0.04269 | 1.08526 |
| C556 | 0.65236 | 0.99176 | 0.99085 |
| C557 | 0.66702 | 0.96916 | 0.97888 |
| C558 | 0.65108 | 0.95257 | 0.88349 |
| C559 | 0.62134 | 0.95936 | 0.79316 |
| C560 | 0.60762 | 0.9824  | 0.80144 |
| N561 | 0.70789 | 0.08723 | 1.00987 |
| N562 | 0.66617 | 0.92925 | 0.88396 |
| O563 | 0.56456 | 0.3155  | 0.59684 |
| O564 | 0.03387 | 0.20607 | 0.97381 |
| H565 | 0.31179 | 0.80604 | 0.89541 |
| H566 | 0.28595 | 0.84268 | 0.96315 |
| H567 | 0.11254 | 0.78734 | 1.08125 |
| H568 | 0.138   | 0.75044 | 1.00601 |
| H569 | 0.16066 | 0.86907 | 1.08024 |
| H570 | 0.26027 | 0.72616 | 0.82837 |
| H571 | 0.08861 | 0.81157 | 0.89643 |
| H572 | 0.02041 | 0.81974 | 0.91277 |
| H573 | 0.04377 | 0.87066 | 1.24845 |
| H574 | 0.1113  | 0.86064 | 1.24423 |

|      |         |         |         |
|------|---------|---------|---------|
| H575 | 0.27181 | 0.85768 | 1.21432 |
| H576 | 0.31166 | 0.89404 | 1.24976 |
| H577 | 0.24462 | 0.93023 | 0.93651 |
| H578 | 0.20484 | 0.89364 | 0.90198 |
| H579 | 0.31533 | 0.78806 | 0.6608  |
| H580 | 0.3832  | 0.78373 | 0.59357 |
| H581 | 0.38987 | 0.72695 | 0.90392 |
| H582 | 0.32247 | 0.7317  | 0.97232 |
| H583 | 0.14625 | 0.73198 | 0.75061 |
| H584 | 0.11282 | 0.69281 | 0.73086 |
| H585 | 0.19134 | 0.66409 | 1.03496 |
| H586 | 0.22445 | 0.70318 | 1.05352 |
| H587 | 0.98819 | 0.88935 | 1.11325 |
| H588 | 0.32774 | 0.93597 | 1.19728 |
| H589 | 0.10649 | 0.64984 | 0.79227 |
| H590 | 0.44862 | 0.7396  | 0.76361 |
| H591 | 0.56886 | 0.04833 | 0.92952 |
| H592 | 0.50203 | 0.05427 | 0.96889 |
| H593 | 0.67296 | 1.03129 | 0.78259 |
| H594 | 0.71685 | 0.05072 | 0.84091 |
| H595 | 0.64337 | 0.07587 | 1.17922 |
| H596 | 0.60184 | 0.0402  | 1.15712 |
| H597 | 0.66428 | 1.00384 | 1.07012 |
| H598 | 0.69007 | 0.9641  | 1.04809 |
| H599 | 0.60926 | 0.94734 | 0.71409 |
| H600 | 0.58588 | 0.98771 | 0.72716 |
| C601 | 0.30308 | 0.30286 | 0.99901 |
| C602 | 0.28764 | 0.28009 | 0.9588  |
| C603 | 0.24827 | 0.27714 | 0.92292 |
| C604 | 0.2249  | 0.29678 | 0.93453 |
| C605 | 0.23982 | 0.31887 | 0.97592 |
| C606 | 0.27888 | 0.32243 | 1.0073  |
| C607 | 0.34258 | 0.30595 | 1.03218 |
| C608 | 0.36462 | 0.28567 | 1.04122 |

|      |         |         |         |
|------|---------|---------|---------|
| C609 | 0.34959 | 0.26338 | 1.00189 |
| C610 | 0.31145 | 0.26028 | 0.95681 |
| C611 | 0.29442 | 0.34511 | 1.04522 |
| C612 | 0.33392 | 0.34825 | 1.06447 |
| C613 | 0.35854 | 0.32917 | 1.05812 |
| C614 | 0.23316 | 0.25444 | 0.88135 |
| C615 | 0.25737 | 0.23528 | 0.87743 |
| C616 | 0.29597 | 0.23773 | 0.91533 |
| C617 | 0.40069 | 0.33482 | 1.06974 |
| C618 | 0.27041 | 0.36601 | 1.06718 |
| C619 | 0.3186  | 0.21601 | 0.91103 |
| C620 | 0.19222 | 0.24969 | 0.84364 |
| C621 | 0.42715 | 0.32481 | 0.97433 |
| C622 | 0.46602 | 0.33187 | 0.97682 |
| C623 | 0.47903 | 0.34989 | 1.07011 |
| C624 | 0.45294 | 0.35986 | 1.16607 |
| C625 | 0.41428 | 0.35227 | 1.16671 |
| C626 | 0.24039 | 0.36504 | 1.16926 |
| C627 | 0.21777 | 0.38459 | 1.19148 |
| C628 | 0.22501 | 0.40562 | 1.11269 |
| C629 | 0.25563 | 0.40686 | 1.01245 |
| C630 | 0.27829 | 0.38722 | 0.99047 |
| C631 | 0.17467 | 0.2631  | 0.73732 |
| C632 | 0.13611 | 0.25869 | 0.7037  |
| C633 | 0.11463 | 0.24033 | 0.77356 |
| C634 | 0.13238 | 0.22644 | 0.87713 |
| C635 | 0.17085 | 0.23103 | 0.9115  |
| C636 | 0.3504  | 0.21447 | 0.8179  |
| C637 | 0.36932 | 0.19312 | 0.80469 |
| C638 | 0.35656 | 0.17297 | 0.88408 |
| C639 | 0.32505 | 0.17469 | 0.97903 |
| C640 | 0.3062  | 0.19598 | 0.99194 |
| C641 | 0.51929 | 0.35893 | 1.06511 |
| C642 | 0.19963 | 0.42568 | 1.13335 |

|      |         |         |         |
|------|---------|---------|---------|
| C643 | 0.37589 | 0.15028 | 0.86633 |
| C644 | 0.07392 | 0.23546 | 0.7393  |
| C645 | 0.95396 | 0.52749 | 0.91436 |
| C646 | 0.96855 | 0.55119 | 0.90571 |
| C647 | 1.00786 | 0.55671 | 0.91575 |
| N648 | 0.91264 | 0.52184 | 0.92124 |
| C649 | 0.88566 | 0.54023 | 0.94909 |
| C650 | 0.89696 | 0.49775 | 0.90511 |
| C651 | 0.85189 | 0.54113 | 0.86914 |
| C652 | 0.82694 | 0.55968 | 0.88859 |
| C653 | 0.83523 | 0.57774 | 0.98726 |
| C654 | 0.86804 | 0.57629 | 1.07299 |
| C655 | 0.89226 | 0.55724 | 1.0569  |
| C656 | 0.86627 | 0.48946 | 0.99377 |
| C657 | 0.85161 | 0.4661  | 0.98335 |
| C658 | 0.86755 | 0.45033 | 0.88627 |
| C659 | 0.89729 | 0.45864 | 0.79279 |
| C660 | 0.91101 | 0.48238 | 0.79961 |
| N661 | 0.81075 | 0.59762 | 0.99015 |
| N662 | 0.85246 | 0.42624 | 0.88834 |
| O663 | 0.95407 | 0.83321 | 0.56192 |
| O664 | 0.47234 | 0.72503 | 0.93629 |
| H665 | 0.19442 | 0.29527 | 0.91589 |
| H666 | 0.22026 | 0.33323 | 0.98089 |
| H667 | 0.39367 | 0.28675 | 1.08061 |
| H668 | 0.36821 | 0.24855 | 1.00806 |
| H669 | 0.34555 | 0.36603 | 1.0847  |
| H670 | 0.24594 | 0.21803 | 0.84339 |
| H671 | 0.4176  | 0.31221 | 0.89324 |
| H672 | 0.4858  | 0.32386 | 0.90235 |
| H673 | 0.46244 | 0.37358 | 1.24051 |
| H674 | 0.39491 | 0.36011 | 1.24345 |
| H675 | 0.2344  | 0.34896 | 1.23057 |
| H676 | 0.19455 | 0.38329 | 1.27023 |

|      |         |         |         |
|------|---------|---------|---------|
| H677 | 0.26159 | 0.4229  | 0.94987 |
| H678 | 0.30137 | 0.38834 | 0.91112 |
| H679 | 0.19088 | 0.27712 | 0.68167 |
| H680 | 0.12301 | 0.26932 | 0.62163 |
| H681 | 0.11634 | 0.2122  | 0.93269 |
| H682 | 0.18374 | 0.22039 | 0.99394 |
| H683 | 0.35996 | 0.22967 | 0.75354 |
| H684 | 0.39339 | 0.1922  | 0.73024 |
| H685 | 0.31488 | 0.15948 | 1.04267 |
| H686 | 0.28176 | 0.19688 | 1.06475 |
| H687 | 0.53044 | 0.36989 | 1.15179 |
| H688 | 0.17847 | 0.42439 | 1.21946 |
| H689 | 0.39972 | 0.14956 | 0.79098 |
| H690 | 0.05759 | 0.22186 | 0.79861 |
| H691 | 0.94978 | 0.56582 | 0.89505 |
| H692 | 0.00418 | 0.54933 | 0.98104 |
| H693 | 0.84568 | 0.52794 | 0.78769 |
| H694 | 0.80179 | 0.56065 | 0.82215 |
| H695 | 0.87526 | 0.58955 | 1.15266 |
| H696 | 0.91679 | 0.55601 | 1.12616 |
| H697 | 0.85435 | 0.50093 | 1.0743  |
| H698 | 0.82856 | 0.45987 | 1.055   |
| H699 | 0.90938 | 0.44724 | 0.71244 |
| H700 | 0.93275 | 0.4888  | 0.72302 |
| C701 | 0.70934 | 0.73852 | 0.96552 |
| C702 | 0.72479 | 0.76129 | 0.92242 |
| C703 | 0.76415 | 0.76424 | 0.88225 |
| C704 | 0.78752 | 0.74459 | 0.89252 |
| C705 | 0.7726  | 0.72251 | 0.93671 |
| C706 | 0.73354 | 0.71895 | 0.97238 |
| C707 | 0.66984 | 0.73543 | 1.003   |
| C708 | 0.6478  | 0.75571 | 1.01321 |
| C709 | 0.66283 | 0.778   | 0.97105 |
| C710 | 0.70097 | 0.7811  | 0.9218  |

|      |         |         |         |
|------|---------|---------|---------|
| C711 | 0.718   | 0.69626 | 1.01319 |
| C712 | 0.67851 | 0.69313 | 1.03675 |
| C713 | 0.65388 | 0.71221 | 1.03191 |
| C714 | 0.77926 | 0.78694 | 0.83782 |
| C715 | 0.75505 | 0.8061  | 0.83536 |
| C716 | 0.71645 | 0.80365 | 0.87744 |
| C717 | 0.61173 | 0.70656 | 1.04826 |
| C718 | 0.74201 | 0.67537 | 1.03382 |
| C719 | 0.69382 | 0.82537 | 0.87428 |
| C720 | 0.8202  | 0.79169 | 0.79556 |
| C721 | 0.58527 | 0.71657 | 0.95506 |
| C722 | 0.54641 | 0.70951 | 0.96201 |
| C723 | 0.5334  | 0.69149 | 1.05767 |
| C724 | 0.55948 | 0.68152 | 1.15146 |
| C725 | 0.59814 | 0.68911 | 1.14763 |
| C726 | 0.77203 | 0.67634 | 1.1327  |
| C727 | 0.79466 | 0.65679 | 1.15365 |
| C728 | 0.78741 | 0.63576 | 1.0768  |
| C729 | 0.7568  | 0.63452 | 0.97983 |
| C730 | 0.73413 | 0.65416 | 0.95912 |
| C731 | 0.83775 | 0.77828 | 0.68816 |
| C732 | 0.87631 | 0.78269 | 0.65026 |
| C733 | 0.89779 | 0.80105 | 0.71684 |
| C734 | 0.88004 | 0.81494 | 0.82148 |
| C735 | 0.84157 | 0.81035 | 0.86014 |
| C736 | 0.66202 | 0.82691 | 0.78439 |
| C737 | 0.6431  | 0.84826 | 0.77197 |
| C738 | 0.65586 | 0.86841 | 0.84889 |
| C739 | 0.68737 | 0.86669 | 0.94064 |
| C740 | 0.70622 | 0.84539 | 0.95277 |
| C741 | 0.49313 | 0.68245 | 1.05739 |
| C742 | 0.81279 | 0.6157  | 1.09593 |
| C743 | 0.63653 | 0.8911  | 0.83189 |
| C744 | 0.9385  | 0.80592 | 0.67804 |

|      |         |         |         |
|------|---------|---------|---------|
| C745 | 0.05846 | 0.51389 | 0.9616  |
| C746 | 0.04387 | 0.49019 | 0.9558  |
| C747 | 0.00456 | 0.48467 | 0.97027 |
| N748 | 0.09978 | 0.51954 | 0.96383 |
| C749 | 0.12676 | 0.50115 | 0.9899  |
| C750 | 0.11546 | 0.54363 | 0.94471 |
| C751 | 0.16053 | 0.50025 | 0.90646 |
| C752 | 0.18548 | 0.4817  | 0.92434 |
| C753 | 0.17719 | 0.46364 | 1.02489 |
| C754 | 0.14438 | 0.46509 | 1.11397 |
| C755 | 0.12016 | 0.48414 | 1.09934 |
| C756 | 0.14615 | 0.55192 | 1.02969 |
| C757 | 0.16081 | 0.57527 | 1.01642 |
| C758 | 0.14487 | 0.59105 | 0.92013 |
| C759 | 0.11513 | 0.58274 | 0.83022 |
| C760 | 0.10141 | 0.559   | 0.83982 |
| N761 | 0.20167 | 0.44376 | 1.02634 |
| N762 | 0.15996 | 0.61514 | 0.91926 |
| O763 | 0.05835 | 0.20817 | 0.62634 |
| O764 | 0.54008 | 0.31635 | 0.94422 |
| H765 | 0.818   | 0.74611 | 0.87061 |
| H766 | 0.79216 | 0.70815 | 0.94044 |
| H767 | 0.61875 | 0.75463 | 1.05569 |
| H768 | 0.64421 | 0.79283 | 0.97833 |
| H769 | 0.66687 | 0.67535 | 1.0592  |
| H770 | 0.76648 | 0.82335 | 0.79916 |
| H771 | 0.59482 | 0.72917 | 0.87226 |
| H772 | 0.52662 | 0.71752 | 0.88915 |
| H773 | 0.54998 | 0.6678  | 1.22767 |
| H774 | 0.61751 | 0.68127 | 1.22278 |
| H775 | 0.77802 | 0.69242 | 1.19248 |
| H776 | 0.81787 | 0.65809 | 1.2299  |
| H777 | 0.75083 | 0.61848 | 0.91878 |
| H778 | 0.71105 | 0.65304 | 0.88225 |

|      |         |         |         |
|------|---------|---------|---------|
| H779 | 0.82154 | 0.76426 | 0.63499 |
| H780 | 0.88941 | 0.77206 | 0.56742 |
| H781 | 0.89608 | 0.82918 | 0.87457 |
| H782 | 0.82868 | 0.82099 | 0.94333 |
| H783 | 0.65246 | 0.81171 | 0.72189 |
| H784 | 0.61903 | 0.84917 | 0.69999 |
| H785 | 0.69755 | 0.8819  | 1.00236 |
| H786 | 0.73066 | 0.8445  | 1.02307 |
| H787 | 0.48198 | 0.67148 | 1.14585 |
| H788 | 0.83395 | 0.61699 | 1.17976 |
| H789 | 0.6127  | 0.89182 | 0.75899 |
| H790 | 0.95483 | 0.81952 | 0.73488 |
| H791 | 0.06265 | 0.47556 | 0.944   |
| H792 | 1.00824 | 0.49205 | 0.93011 |
| H793 | 0.16675 | 0.51344 | 0.82362 |
| H794 | 0.21063 | 0.48073 | 0.85532 |
| H795 | 0.13716 | 0.45182 | 1.19514 |
| H796 | 0.09563 | 0.48537 | 1.1711  |
| H797 | 0.15807 | 0.54045 | 1.10962 |
| H798 | 0.18386 | 0.58151 | 1.08532 |
| H799 | 0.10305 | 0.59414 | 0.7505  |
| H800 | 0.07967 | 0.55258 | 0.76586 |
| H794 | 0.21063 | 0.48073 | 0.85532 |
| H795 | 0.13716 | 0.45182 | 1.19514 |
| H796 | 0.09563 | 0.48537 | 1.1711  |
| H797 | 0.15807 | 0.54045 | 1.10962 |
| H798 | 0.18386 | 0.58151 | 1.08532 |
| H799 | 0.10305 | 0.59414 | 0.7505  |
| H800 | 0.07967 | 0.55258 | 0.76586 |

**Table S1.** Unit cell parameters of PyT-1 with AB stacking structure.

| Pyt-2                                                                   |         |         |         |
|-------------------------------------------------------------------------|---------|---------|---------|
| Triclinic P1                                                            |         |         |         |
| a=7.6860 Å, b=21.6648 Å, 24.5280 Å                                      |         |         |         |
| $\alpha = 89.5052^\circ, \beta = 88.1686^\circ, \gamma = 91.8171^\circ$ |         |         |         |
| C1                                                                      | 0.05174 | 0.94848 | 0.55905 |
| C2                                                                      | 0.12252 | 0.89903 | 0.53062 |
| C3                                                                      | 0.09137 | 0.94923 | 0.38598 |
| C4                                                                      | 0.38255 | 0.0988  | 0.34645 |
| C5                                                                      | 0.32974 | 0.15688 | 0.36482 |
| C6                                                                      | 0.2719  | 0.20128 | 0.3281  |
| C7                                                                      | 0.2665  | 0.18817 | 0.2724  |
| C8                                                                      | 0.31846 | 0.1305  | 0.25396 |
| C9                                                                      | 0.37522 | 0.08665 | 0.2904  |
| C10                                                                     | 0.20996 | 0.23422 | 0.23289 |
| C11                                                                     | 0.06492 | 0.53707 | 0.04284 |
| C12                                                                     | 0.39092 | 0.6648  | 0.95437 |
| C13                                                                     | 0.30751 | 0.72115 | 0.96049 |
| C14                                                                     | 0.26571 | 0.75666 | 0.91564 |
| C15                                                                     | 0.30445 | 0.73666 | 0.86302 |
| C16                                                                     | 0.38667 | 0.68029 | 0.85546 |
| C17                                                                     | 0.43043 | 0.6449  | 0.90095 |
| N18                                                                     | 0.25776 | 0.77544 | 0.81884 |
| C19                                                                     | 0.47084 | 0.56435 | 0.00071 |
| N20                                                                     | 0.43803 | 0.62995 | 0.00255 |
| C21                                                                     | 0.40879 | 0.04914 | 0.5567  |
| C22                                                                     | 0.34887 | 0.09848 | 0.52621 |
| C23                                                                     | 0.44723 | 0.04962 | 0.38335 |
| C24                                                                     | 0.16118 | 0.89819 | 0.35232 |
| C25                                                                     | 0.1373  | 0.83573 | 0.36761 |
| C26                                                                     | 0.18941 | 0.78885 | 0.33211 |
| C27                                                                     | 0.26631 | 0.804   | 0.28103 |
| C28                                                                     | 0.29159 | 0.86614 | 0.26599 |
| C29                                                                     | 0.23915 | 0.91252 | 0.30109 |
| C30                                                                     | 0.30675 | 0.75569 | 0.24136 |

|     |         |         |         |
|-----|---------|---------|---------|
| C31 | 0.09647 | 0.47401 | 0.04203 |
| C32 | 0.07042 | 0.33976 | 0.94547 |
| C33 | 0.47961 | 0.279   | 0.94278 |
| C34 | 0.49272 | 0.2448  | 0.89514 |
| C35 | 0.0976  | 0.27093 | 0.84884 |
| C36 | 0.16789 | 0.3315  | 0.85035 |
| C37 | 0.15427 | 0.36566 | 0.89847 |
| N38 | 0.1311  | 0.23074 | 0.80412 |
| C39 | 0.00648 | 0.0001  | 0.47105 |
| C40 | 0.03364 | 0.00042 | 0.35783 |
| C41 | 0.43433 | 0.04959 | 0.4411  |
| C42 | 0.36163 | 0.09868 | 0.46955 |
| C43 | 0.39471 | 0.04865 | 0.61417 |
| C44 | 0.1016  | 0.899   | 0.65373 |
| C45 | 0.15215 | 0.84065 | 0.63538 |
| C46 | 0.20826 | 0.79595 | 0.67212 |
| C47 | 0.21416 | 0.80905 | 0.72781 |
| C48 | 0.16444 | 0.86698 | 0.74623 |
| C49 | 0.10939 | 0.91112 | 0.70978 |
| C50 | 0.2689  | 0.76271 | 0.76735 |
| C51 | 0.44116 | 0.46422 | 0.95709 |
| C52 | 0.12288 | 0.33684 | 0.04548 |
| C53 | 0.20848 | 0.28092 | 0.03934 |
| C54 | 0.25166 | 0.24564 | 0.08416 |
| C55 | 0.21214 | 0.26544 | 0.1368  |
| C56 | 0.12773 | 0.32138 | 0.14438 |
| C57 | 0.0826  | 0.35654 | 0.09891 |
| N58 | 0.26033 | 0.22691 | 0.18096 |
| C59 | 0.03908 | 0.43686 | 0.99918 |
| N60 | 0.07441 | 0.37144 | 0.99732 |
| C61 | 0.07728 | 0.94881 | 0.44346 |
| C62 | 0.13527 | 0.89917 | 0.47396 |
| C63 | 0.03884 | 0.94851 | 0.6168  |
| C64 | 0.32292 | 0.09933 | 0.64786 |

|     |         |         |         |
|-----|---------|---------|---------|
| C65 | 0.34441 | 0.16187 | 0.6326  |
| C66 | 0.29048 | 0.20847 | 0.66811 |
| C67 | 0.21414 | 0.19296 | 0.71919 |
| C68 | 0.19123 | 0.13073 | 0.73421 |
| C69 | 0.24547 | 0.08462 | 0.69909 |
| C70 | 0.17183 | 0.24104 | 0.75888 |
| C71 | 0.41205 | 0.52746 | 0.95787 |
| C72 | 0.44324 | 0.66163 | 0.05438 |
| C73 | 0.01935 | 0.72201 | 0.05723 |
| C74 | 0.00491 | 0.75613 | 0.10488 |
| C75 | 0.41872 | 0.73061 | 0.15098 |
| C76 | 0.34614 | 0.67036 | 0.14949 |
| C77 | 0.35844 | 0.63612 | 0.10139 |
| N78 | 0.38678 | 0.77097 | 0.19569 |
| C79 | 0.48158 | 0.99821 | 0.52908 |
| C80 | 0.45443 | 0.99777 | 0.6423  |
| C81 | 0.5418  | 0.9471  | 0.55916 |
| C82 | 0.6145  | 0.89802 | 0.53071 |
| C83 | 0.58141 | 0.94805 | 0.38609 |
| C84 | 0.8984  | 0.101   | 0.34627 |
| C85 | 0.84785 | 0.15935 | 0.36462 |
| C86 | 0.79174 | 0.20405 | 0.32788 |
| C87 | 0.78584 | 0.19095 | 0.27219 |
| C88 | 0.83556 | 0.13302 | 0.25377 |
| C89 | 0.89061 | 0.08888 | 0.29022 |
| C90 | 0.7311  | 0.23729 | 0.23265 |
| C91 | 0.55884 | 0.53578 | 0.04291 |
| C92 | 0.89199 | 0.66521 | 0.95436 |
| C93 | 0.80638 | 0.72113 | 0.9605  |
| C94 | 0.76321 | 0.75642 | 0.91567 |
| C95 | 0.80273 | 0.73662 | 0.86304 |
| C96 | 0.88714 | 0.68067 | 0.85545 |
| C97 | 0.93227 | 0.64552 | 0.90093 |
| N98 | 0.75454 | 0.77515 | 0.81887 |

|      |         |          |         |
|------|---------|----------|---------|
| C99  | 0.97579 | 0.5652   | 0.00066 |
| N100 | 0.94046 | 0.63061  | 0.00252 |
| C101 | 0.92272 | 0.05119  | 0.55654 |
| C102 | 0.86473 | 0.10083  | 0.52604 |
| C103 | 0.96116 | 0.05149  | 0.3832  |
| C104 | 0.65321 | 0.89737  | 0.3524  |
| C105 | 0.63171 | 0.83483  | 0.36767 |
| C106 | 0.68565 | 0.78822  | 0.33215 |
| C107 | 0.76199 | 0.80373  | 0.28107 |
| C108 | 0.7849  | 0.86597  | 0.26606 |
| C109 | 0.73065 | 0.91207  | 0.30117 |
| C110 | 0.8043  | 0.75565  | 0.24139 |
| C111 | 0.58795 | 0.47254  | 0.04213 |
| C112 | 0.55676 | 0.33837  | 0.94562 |
| C113 | 0.99552 | 0.28005  | 0.94261 |
| C114 | 1.00995 | 0.24592  | 0.89495 |
| C115 | 0.58128 | 0.26939  | 0.84902 |
| C116 | 0.65386 | 0.32964  | 0.85051 |
| C117 | 0.64156 | 0.36388  | 0.89861 |
| N118 | 0.61322 | 0.22903  | 0.80431 |
| C119 | 0.49454 | -0.00151 | 0.47118 |
| C120 | 0.52169 | -0.00107 | 0.35796 |
| C121 | 0.94826 | 0.05152  | 0.44095 |
| C122 | 0.87748 | 0.10097  | 0.46938 |
| C123 | 0.90863 | 0.05077  | 0.61402 |
| C124 | 0.59358 | 0.8979   | 0.65382 |
| C125 | 0.64639 | 0.83981  | 0.63544 |
| C126 | 0.70423 | 0.79542  | 0.67216 |
| C127 | 0.70963 | 0.80853  | 0.72786 |
| C128 | 0.65767 | 0.8662   | 0.7463  |
| C129 | 0.60091 | 0.91005  | 0.70987 |
| C130 | 0.76617 | 0.76248  | 0.76737 |
| C131 | 0.94995 | 0.46498  | 0.957   |
| C132 | 0.60908 | 0.3352   | 0.04563 |

|      |         |         |         |
|------|---------|---------|---------|
| C133 | 0.69249 | 0.27885 | 0.03951 |
| C134 | 0.73429 | 0.24334 | 0.08436 |
| C135 | 0.69555 | 0.26334 | 0.13698 |
| C136 | 0.61333 | 0.31971 | 0.14454 |
| C137 | 0.56957 | 0.3551  | 0.09905 |
| N138 | 0.74224 | 0.22456 | 0.18116 |
| C139 | 0.52916 | 0.43565 | 0.99929 |
| N140 | 0.56197 | 0.37005 | 0.99745 |
| C141 | 0.56733 | 0.94756 | 0.44357 |
| C142 | 0.62725 | 0.89822 | 0.47405 |
| C143 | 0.52889 | 0.94707 | 0.61691 |
| C144 | 0.83882 | 0.10181 | 0.64768 |
| C145 | 0.8627  | 0.16427 | 0.63239 |
| C146 | 0.81059 | 0.21115 | 0.66789 |
| C147 | 0.73369 | 0.196   | 0.71897 |
| C148 | 0.70841 | 0.13386 | 0.73401 |
| C149 | 0.76085 | 0.08748 | 0.69891 |
| C150 | 0.69325 | 0.24431 | 0.75864 |
| C151 | 0.9184  | 0.52805 | 0.95781 |
| C152 | 0.94444 | 0.6623  | 0.05436 |
| C153 | 0.52039 | 0.721   | 0.05722 |
| C154 | 0.50728 | 0.7552  | 0.10486 |
| C155 | 0.91727 | 0.73113 | 0.15099 |
| C156 | 0.84698 | 0.67055 | 0.14948 |
| C157 | 0.8606  | 0.63639 | 0.10137 |
| N158 | 0.88377 | 0.77131 | 0.19572 |
| C159 | 0.99352 | 0.9999  | 0.52895 |
| C160 | 0.96636 | 0.99958 | 0.64217 |
| H161 | 0.17112 | 0.85756 | 0.55393 |
| H162 | 0.33438 | 0.16766 | 0.41017 |
| H163 | 0.22929 | 0.24806 | 0.34366 |
| H164 | 0.31441 | 0.11919 | 0.20871 |
| H165 | 0.41701 | 0.03972 | 0.27499 |
| H166 | 0.12673 | 0.27394 | 0.24725 |

|      |         |         |          |
|------|---------|---------|----------|
| H167 | 0.11172 | 0.56654 | 0.07809  |
| H168 | 0.27408 | 0.73759 | 1.00348  |
| H169 | 0.19926 | 0.80249 | 0.92183  |
| H170 | 0.41774 | 0.66335 | 0.81247  |
| H171 | 0.49884 | 0.59941 | 0.89496  |
| H172 | 0.28844 | 0.13938 | 0.54779  |
| H173 | 0.07501 | 0.8233  | 0.40923  |
| H174 | 0.16917 | 0.73834 | 0.34485  |
| H175 | 0.35558 | 0.87902 | 0.22471  |
| H176 | 0.25928 | 0.96305 | 0.28839  |
| H177 | 0.2678  | 0.70546 | 0.25092  |
| H178 | 0.16977 | 0.45201 | 0.07649  |
| H179 | 0.40543 | 0.25882 | 0.98013  |
| H180 | 0.43083 | 0.19634 | 0.89365  |
| H181 | 0.23602 | 0.35288 | 0.81244  |
| H182 | 0.21137 | 0.41482 | 0.8997   |
| H183 | 0.04428 | 0.00221 | 0.31138  |
| H184 | 0.31142 | 0.13989 | 0.44626  |
| H185 | 0.1471  | 0.82989 | 0.59003  |
| H186 | 0.24905 | 0.74895 | 0.65658  |
| H187 | 0.16892 | 0.87828 | 0.79148  |
| H188 | 0.06942 | 0.95828 | 0.72516  |
| H189 | 0.3198  | 0.71675 | 0.75246  |
| H190 | 0.39325 | 0.43496 | 0.92185  |
| H191 | 0.24256 | 0.26465 | -0.00366 |
| H192 | 0.31989 | 0.20015 | 0.07796  |
| H193 | 0.096   | 0.33816 | 0.18738  |
| H194 | 0.01242 | 0.40167 | 0.10492  |
| H195 | 0.19411 | 0.85796 | 0.45241  |
| H196 | 0.40624 | 0.17459 | 0.59098  |
| H197 | 0.30879 | 0.25906 | 0.65539  |
| H198 | 0.12771 | 0.11755 | 0.77549  |
| H199 | 0.22727 | 0.03403 | 0.71177  |
| H200 | 0.17808 | 0.29172 | 0.74582  |

|      |         |         |         |
|------|---------|---------|---------|
| H201 | 0.33964 | 0.54982 | 0.9234  |
| H202 | 0.09278 | 0.74254 | 0.01988 |
| H203 | 0.06496 | 0.80486 | 0.10639 |
| H204 | 0.27722 | 0.64931 | 0.18741 |
| H205 | 0.29948 | 0.58722 | 0.10018 |
| H206 | 0.44385 | 0.99593 | 0.68875 |
| H207 | 0.66471 | 0.85681 | 0.554   |
| H208 | 0.8529  | 0.17011 | 0.40997 |
| H209 | 0.75095 | 0.25105 | 0.34342 |
| H210 | 0.83108 | 0.12172 | 0.20852 |
| H211 | 0.93058 | 0.04172 | 0.27484 |
| H212 | 0.6802  | 0.28325 | 0.24754 |
| H213 | 0.60675 | 0.56504 | 0.07815 |
| H214 | 0.77231 | 0.7374  | 1.00349 |
| H215 | 0.69498 | 0.8019  | 0.92188 |
| H216 | 0.91887 | 0.6639  | 0.81246 |
| H217 | 1.00245 | 0.60038 | 0.89492 |
| H218 | 0.80589 | 0.14204 | 0.54759 |
| H219 | 0.56989 | 0.82211 | 0.40929 |
| H220 | 0.66734 | 0.73764 | 0.34487 |
| H221 | 0.84841 | 0.87915 | 0.22478 |
| H222 | 0.74885 | 0.96267 | 0.2885  |
| H223 | 0.76726 | 0.70526 | 0.25093 |
| H224 | 0.66036 | 0.45018 | 0.0766  |
| H225 | 0.92209 | 0.25952 | 0.97996 |
| H226 | 0.94991 | 0.1972  | 0.89345 |
| H227 | 0.72278 | 0.35069 | 0.81259 |
| H228 | 0.70052 | 0.41278 | 0.89982 |
| H229 | 0.53228 | 0.00077 | 0.31151 |
| H230 | 0.82888 | 0.14244 | 0.44607 |
| H231 | 0.64175 | 0.82904 | 0.59009 |
| H232 | 0.74684 | 0.74864 | 0.6566  |
| H233 | 0.66171 | 0.87751 | 0.79156 |
| H234 | 0.55911 | 0.95698 | 0.72527 |

|      |         |         |          |
|------|---------|---------|----------|
| H235 | 0.81885 | 0.71679 | 0.75247  |
| H236 | 0.90315 | 0.43551 | 0.92175  |
| H237 | 0.72592 | 0.26241 | -0.00348 |
| H238 | 0.80074 | 0.19751 | 0.07817  |
| H239 | 0.58226 | 0.33665 | 0.18753  |
| H240 | 0.50116 | 0.40059 | 0.10504  |
| H241 | 0.68769 | 0.85732 | 0.45248  |
| H242 | 0.92499 | 0.1767  | 0.59077  |
| H243 | 0.83083 | 0.26166 | 0.65515  |
| H244 | 0.64442 | 0.12098 | 0.77529  |
| H245 | 0.74072 | 0.03695 | 0.71161  |
| H246 | 0.7322  | 0.29454 | 0.74908  |
| H247 | 0.8451  | 0.55005 | 0.92334  |
| H248 | 0.59457 | 0.74118 | 0.01987  |
| H249 | 0.56917 | 0.80366 | 0.10635  |
| H250 | 0.77885 | 0.64918 | 0.1874   |
| H251 | 0.8035  | 0.58723 | 0.10013  |
| H252 | 0.95572 | 0.99779 | 0.68862  |

**Table S2.** Unit cell parameters of PyT-2 with AA stacking structure.

## Section S3 SEM analysis

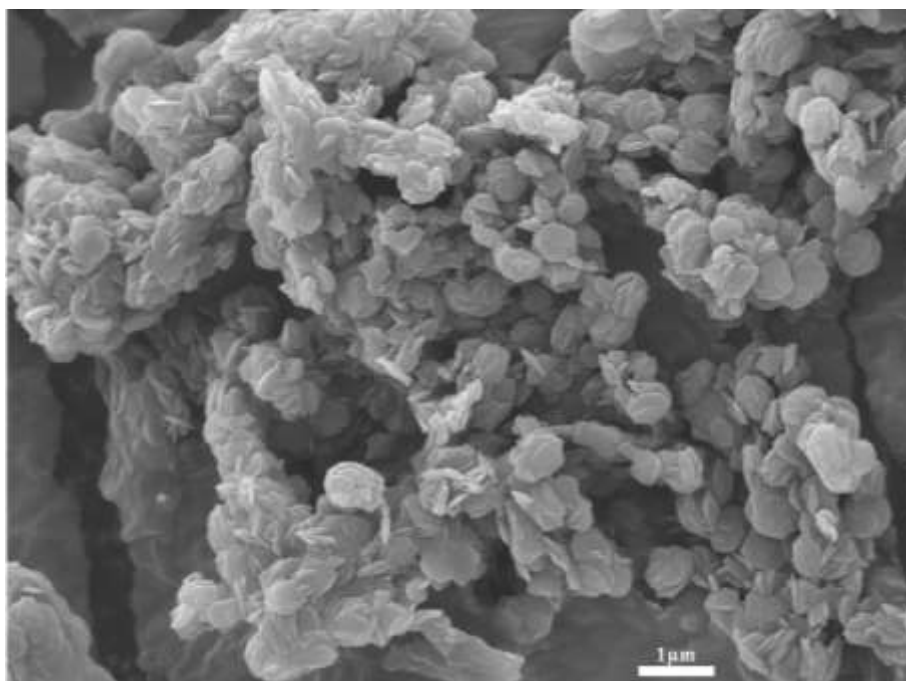

**Figure S2.** SEM image of PyT-1.

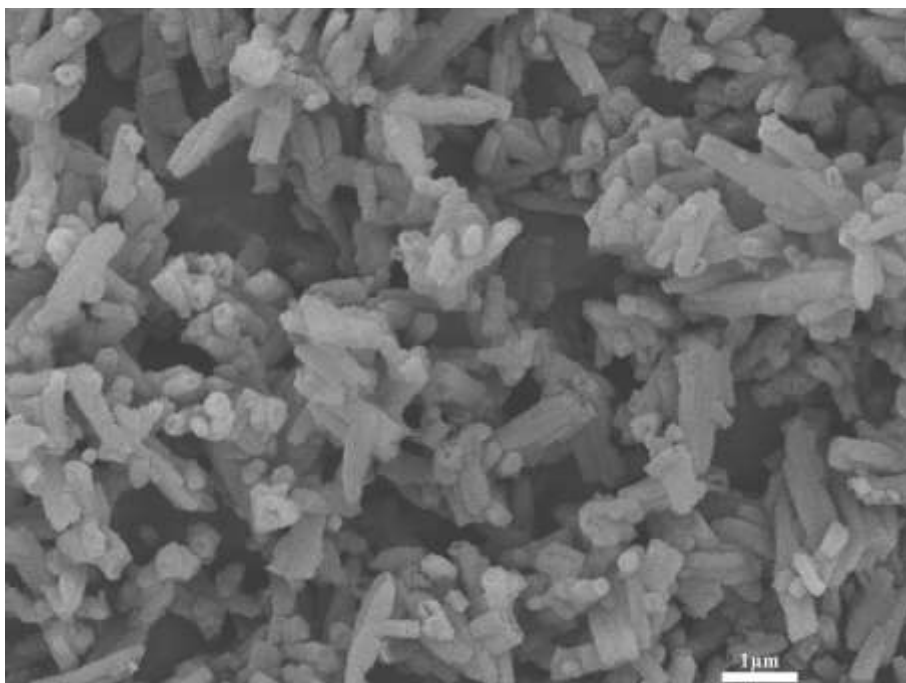

**Figure S3.** SEM image of PyT-2.

## Section S4 Thermogravimetric analysis and structural stability

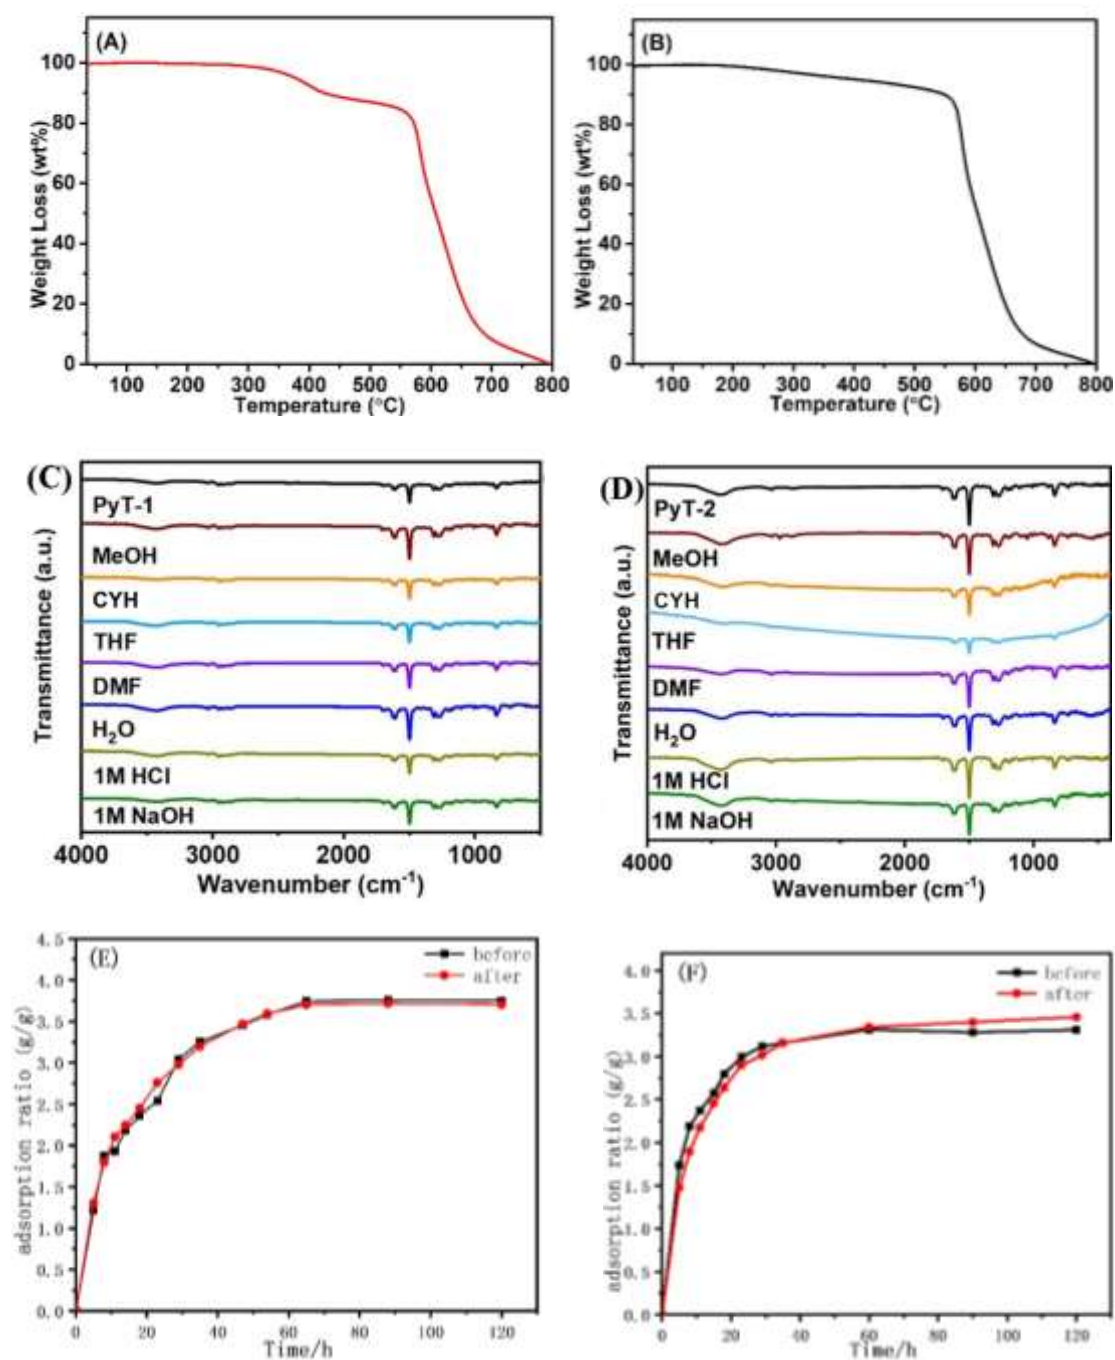

**Figure S4.** TGA curves of PyT-1 (A) and PyT-2 (B), FTIR spectra in various solvents of PyT-1 (C) and PyT-2 (D) and iodine vapor adsorption capacities of PyT-1(E), PyT-2(F) before and after being immersed in n-hexane.

## S5 Iodine vapor adsorption experiment

The experiments were carried out as follows: COFs (5mg) in bottle were exposed in a sealed device (10ml) filling with excess iodine. The bottles were removed periodically, cooled to room temperature, and removed to measure the overall difference in the mass of the vials before and after. Adsorption stability was measured by weighing the daily mass change of the adsorbed material over a period of seven days at room temperature and pressure. The recyclability of COFs for capturing of iodine vapor was carried out 5 cycles after the COFs were rinsed with ethanol to release iodine.

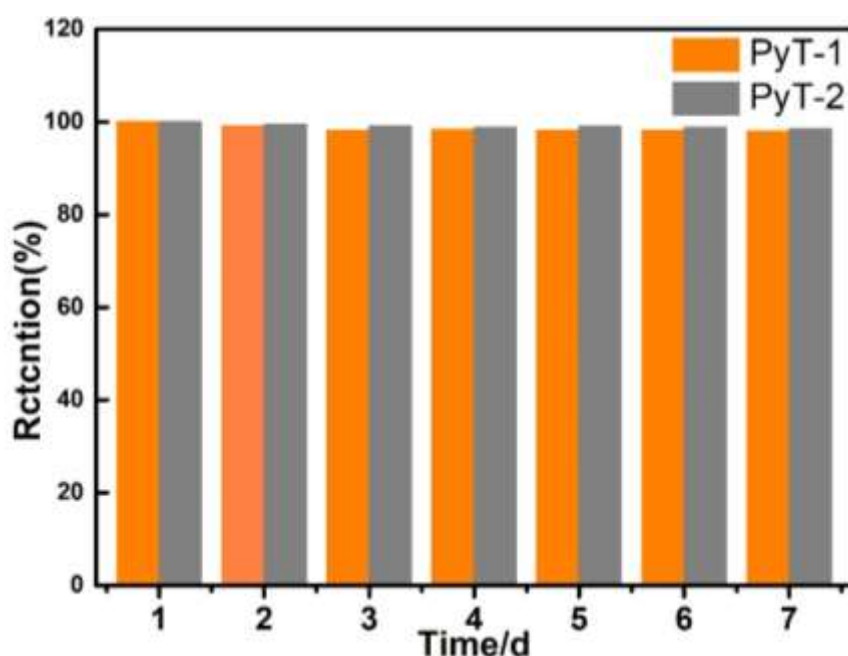

**Figure S5.** iodine retention of PyT-1, PyT-2 exposure to air at 25 °C and ambient pressure after iodine capture.

## Section S6 Iodine solution adsorption experiment

Iodine containing solutions at concentrations of 400 mg L<sup>-1</sup> and 200 mg L<sup>-1</sup> were prepared, and 20 ml of each solution was added to the volumetric flask with 2 mg COF powder in it. The amount of iodine absorbed by COF can also be calculated by the equation (1). The pseudo-first-order and pseudo-second-order kinetic models were used to study the adsorption kinetics of iodine solution according to equation (2) and equation (3), respectively.

$$q_t = q_e ( 1 - \exp (-k_1 t) ) \quad (2)$$

$$q_t = (k_2 q_e^2 t) / ( 1 + k_2 q_e t ) \quad (3)$$

where  $q_e$  (g g<sup>-1</sup>) and  $q_t$  (g g<sup>-1</sup>) are the adsorption value at equilibrium and time  $t$  (min), respectively.  $k_1$  (min<sup>-1</sup>) and  $k_2$  (min<sup>-1</sup>) are the rate constant of pseudo-first-order and pseudo-second-order adsorption, respectively (details are given in Table S4).

| <b>Porous material</b> | <b>I<sub>2</sub> solution concentration (mg L<sup>-1</sup>)</b> | <b>I<sub>2</sub> solution uptake (mg g<sup>-1</sup>)</b> | <b>Ref.</b> |
|------------------------|-----------------------------------------------------------------|----------------------------------------------------------|-------------|
| NOP-54                 | 254                                                             | 22.61                                                    | [1]         |
| TFB-BD COF             | 500                                                             | 99.90                                                    | [2]         |
| Tfp-DB COF             | 500                                                             | 99.9                                                     | [3]         |
| NT-POP@800-1           | 4000                                                            | 396.0                                                    | [4]         |
| PAN-1                  | 2540                                                            | 333.3                                                    | [5]         |
| P-DPDA                 | 400                                                             | 450                                                      | [6]         |
|                        | 200                                                             | 150                                                      |             |
| CACY                   | 400                                                             | 245                                                      | [7]         |
| POP-T                  | 500                                                             | 902.8                                                    | [8]         |
| P-COF                  | 300                                                             | 1295.2                                                   | [9]         |
| PyT-1                  | 400                                                             | 635                                                      | This work   |
|                        | 200                                                             | 365                                                      |             |
| PyT-2                  | 400                                                             | 445                                                      | This work   |
|                        | 200                                                             | 315                                                      |             |

**Table S3.** Summary of representatively reported adsorbents with our work for iodine solution adsorption under ambient pressure.

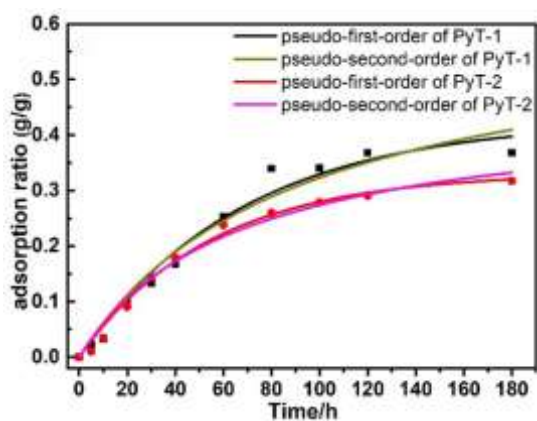

**Figure S6.** Iodine adsorption capacities of PyT-1, PyT-2 in n-hexane with iodine concentration of 200 mg L<sup>-1</sup> (B).

|       | c(I <sub>2</sub> )        | q <sub>e</sub> (exp)<br>(mg g <sup>-1</sup> ) | Pseudo-first-order kinetic model    |                                      |                | Pseudo-second-order kinetic model   |                                      |                |
|-------|---------------------------|-----------------------------------------------|-------------------------------------|--------------------------------------|----------------|-------------------------------------|--------------------------------------|----------------|
|       |                           |                                               | K <sub>1</sub> (min <sup>-1</sup> ) | q <sub>e</sub> (mg g <sup>-1</sup> ) | R <sup>2</sup> | K <sub>1</sub> (min <sup>-1</sup> ) | q <sub>e</sub> (mg g <sup>-1</sup> ) | R <sup>2</sup> |
| PyT-1 | 400<br>mg g <sup>-1</sup> | 635                                           | 0.029                               | 636                                  | 0.998          | 0.014                               | 780                                  | 0.995          |
| PyT-2 |                           | 445                                           | 0.031                               | 442                                  | 0.993          | 0.005                               | 542                                  | 0.991          |
| PyT-1 | 200<br>mg g <sup>-1</sup> | 365                                           | 0.015                               | 428                                  | 0.975          | 0.003                               | 613                                  | 0.964          |
| PyT-2 |                           | 315                                           | 0.018                               | 332                                  | 0.990          | 0.001                               | 453                                  | 0.982          |

**Table S4.** Kinetic parameters for the volatile iodine adsorption onto PyT-1 and PyT-2.

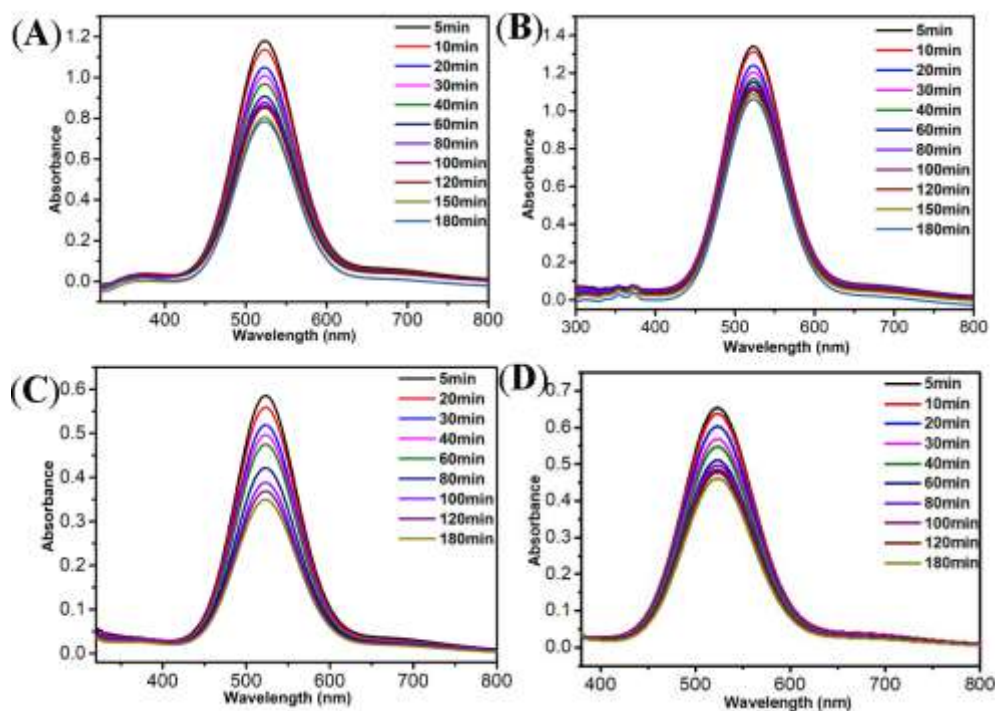

**Figure S7.** (A) UV-vis spectra for PyT-1 in 400 mg L<sup>-1</sup> of iodine in n-hexane solution at different times (B) UV-vis spectra for PyT-2 in 400 mg L<sup>-1</sup> of iodine in n-hexane solution at different times (C) UV-vis spectra for PyT-1 in 200 mg L<sup>-1</sup> of iodine in n-hexane solution at different times (D) UV-vis spectra for PyT-2 in 200 mg L<sup>-1</sup> of iodine in n-hexane solution at different times.

## References:

- [1] Chen, D.; Fu, Y.; Yu, W, et al. Versatile Adamantane-based Porous Polymers with Enhanced Microporosity for Efficient CO<sub>2</sub> Capture and Iodine Removal[J]. Chemical Engineering Journal, 2018: 900-906.
- [2] Song, S.; Shi, Y.; Liu, N, et al. Theoretical Screening and Experimental Synthesis of Ultrahigh-Iodine Capture Covalent Organic Frameworks[J]. ACS Appl Mater Interfaces, 2021, 13(8): 10513-10523.
- [3] Sanansong, Yueshi, Ningliu, et al. C[double bond, length as m-dash]N linked covalent organic framework for the efficient adsorption of iodine in vapor and solution[J]. RSC Advances, 11.
- [4] Yao, C.; Li, G.; Wang, J, et al. Template-free synthesis of porous carbon from triazine based polymers and their use in iodine adsorption and CO<sub>2</sub> capture[J]. Scientific Reports, 2018, 8(1): 1867.
- [5] Ren, Y. Y.; Zhang, W. Y.; Zhu, Y. L, et al. Nitrogen-rich porous polyaminal network as a platform for iodine adsorption through physical and chemical interaction[J]. Journal of Applied Polymer Science, 2018, 135(15).
- [6] Wang, J.; Wang, C. C.; Wang, H. C, et al. Synthesis of N-containing porous aromatic frameworks via Scholl reaction for reversible iodine capture[J]. Microporous and Mesoporous Materials, 2021, 310: 110596.
- [7] Jz, A.; Sf, B.; Yw, A. et al. The adsorbent for efficient iodine capture based on citrazinic acid and cytosine: experimental synthesis with a simple way and property analysis with electronic structure calculations - ScienceDirect[J], 2021.
- [8] Tian, P.; Ai, Z.; Hu, H, et al. Synthesis of Electron-Rich Porous Organic Polymers via Schiff-Base Chemistry for Efficient Iodine Capture[J]. Molecules, 2022, 27(16): 5161.
- [9] Li, Y.; Li, X. G.; Li, J. F, et al. Phosphine-based covalent organic framework for highly efficient iodine capture[J]. Microporous and Mesoporous Materials, 2021, 325.
